# Supplementary figures and images for: The Aerosol Research Observation Station (AEROS)
Source: Copernicus journal article supplement (doi:10.5194/amt-2021-270), 2021-10-04

## Supplements

Figure S1. Schematic of station inlet.

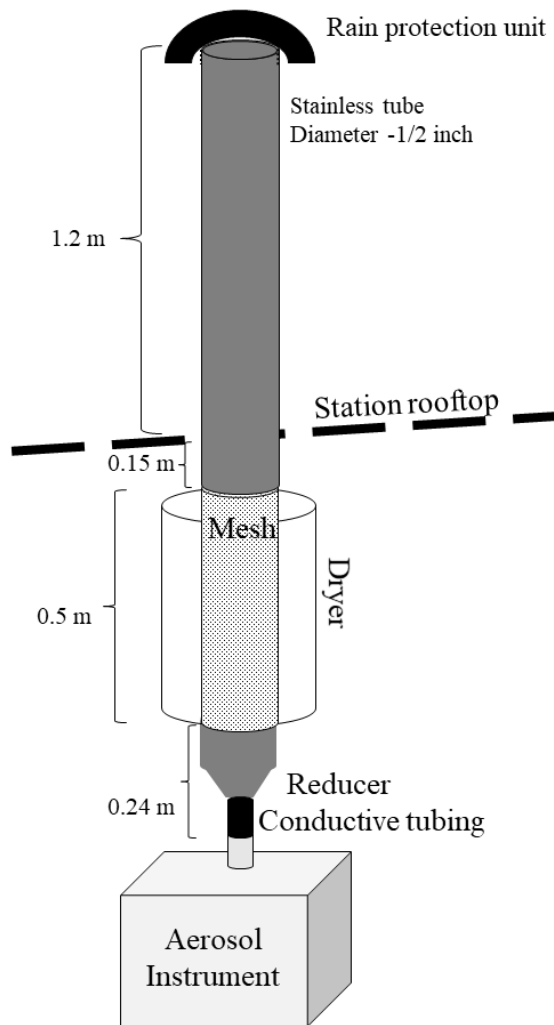

Supplement: Supplementary file 1 [file amt-2021-270-supplement.pdf]
